# Supplementary material
Source: PubMed Central journal article supplement (PMC2976195)
Supplement: supp_76_22_7413__1.pdf [file supp_76_22_7413__1.pdf]

| Accession#                  | Medium   | Method of isolation chamber run |    |    | Closest cultured relative        | Accession # | Similarity,% | Basepairs analyzed | 16S rRNA gene sequence similarities with sequences from other studies (Ref) |      |          |          |          |          |          |          |      |          |     |          |      |  |  |
|-----------------------------|----------|---------------------------------|----|----|----------------------------------|-------------|--------------|--------------------|-----------------------------------------------------------------------------|------|----------|----------|----------|----------|----------|----------|------|----------|-----|----------|------|--|--|
|                             |          | PP                              | 1  | 2  |                                  |             |              |                    | 3                                                                           | (4)  | (8)      | (7)      | (3)      | (1)      | (2)      | (6)      | (5)  | (9)      |     |          |      |  |  |
| <b>Alpha Proteobacteria</b> |          |                                 |    |    |                                  |             |              |                    |                                                                             |      |          |          |          |          |          |          |      |          |     |          |      |  |  |
| Rhizobiales                 |          |                                 |    |    |                                  |             |              |                    |                                                                             |      |          |          |          |          |          |          |      |          |     |          |      |  |  |
| 212                         | HM163253 | A/CY                            | 1  | 5  | Blastobacter denitrificans       | S46917      | 100          | 866                |                                                                             |      |          |          |          | DQ316805 | 98.7     |          |      |          |     |          |      |  |  |
| 224                         | HM163259 | CY                              |    | 1  | Bradyrhizobium sp Tv2a-2         | AF216780    | 99.5         | 854                |                                                                             |      |          |          |          |          |          |          |      |          |     |          |      |  |  |
| 90                          | HM163286 | CY                              | 3  |    | Bradyrhizobium japonense         | AJ250813    | 100          | 864                |                                                                             |      |          |          |          |          |          |          |      |          |     |          |      |  |  |
| 110                         | HM163219 | A/CY                            | 1  | 1  | Bradyrhizobium japonicum         | AF239844    | 99.5         | 654                |                                                                             |      |          |          |          |          |          |          |      |          |     |          |      |  |  |
| 182                         | HM163242 | CY                              |    | 1  | Bradyrhizobium sp LMTR28         | AF485365    | 99.6         | 934                |                                                                             |      |          |          |          |          |          |          |      |          |     |          |      |  |  |
| 160                         | HM163231 | A/CY                            | 4  | 1  | 1 Rhodopseudomonas palustris     | AB033756    | 99.9         | 820                |                                                                             |      |          | DQ125740 | 99.5     |          |          |          |      |          |     |          |      |  |  |
| 44                          | HM163268 | CYE                             | 1  |    | Afipia clevelandensis            | M69186      | 97.8         | 742                |                                                                             |      |          |          |          |          |          |          |      |          |     |          |      |  |  |
| 46                          | HM163269 | A/CY                            | 4  | 1  | Afipia clevelandensis            | M69186      | 97.4         | 808                |                                                                             |      |          |          |          |          |          |          |      |          |     |          |      |  |  |
| 48                          | HM163271 | CY                              | 1  |    | Afipia felis                     | M65248      | 99.7         | 752                |                                                                             |      |          |          |          |          |          |          |      |          |     |          |      |  |  |
| 47                          | HM163270 | CY                              | 1  |    | Afipia genosp 2                  | U87765      | 98.7         | 818                |                                                                             |      |          |          |          |          |          |          |      |          |     |          |      |  |  |
| 74                          | HM163281 | A/CY                            | 1  | 1  | Bradyrhizobium elkanii           | AF293380    | 99.4         | 1391               |                                                                             |      |          | DQ125657 | 97.8     |          | DQ316865 | 99.6     |      |          |     |          |      |  |  |
| 180                         | HM163241 | CY                              | 1  |    | Afipia genosp 12                 | U87783      | 99.2         | 751                |                                                                             |      |          |          |          |          |          |          |      |          |     |          |      |  |  |
| 203                         | HM163248 | A                               | 1  | 1  | Methylobacterium sp MBIC 4305    | AB024616    | 99.8         | 922                |                                                                             |      |          |          |          |          |          |          |      |          |     |          |      |  |  |
| 71                          | HM163280 | A/CY/CYE                        | 1  | 2  | 1 Methylobacterium radiotolerans | D32227      | 99.6         | 1385               |                                                                             |      | AY622227 | 99.6     | AY527754 | 99.5     |          |          |      |          |     |          |      |  |  |
| 145                         | HM163226 | CY                              | 1  |    | Bosea thiooxidans                | X81044      | 98.8         | 336                |                                                                             |      |          |          |          |          |          |          |      |          |     |          |      |  |  |
| 57                          | HM163276 | A/CY/CYE                        | 7  | 1  | Bosea thiooxidans                | X81044      | 99.6         | 828                |                                                                             |      |          |          |          |          |          |          |      |          |     |          |      |  |  |
| 56                          | HM163275 | CY                              |    | 1  | Rhizobium alarii                 | AM931436    | 99.7         | 790                |                                                                             |      |          |          |          |          |          |          |      |          |     |          |      |  |  |
| 13                          | HM163224 | CYE                             | 1  |    | Sinorhizobium sp BK10            | AJ012211    | 100          | 730                |                                                                             |      |          |          |          |          |          |          |      |          |     |          |      |  |  |
| 16                          | HM163230 | CY                              |    | 1  | Ensifer adhaerens                | AF191739    | 99.9         | 708                |                                                                             |      |          |          |          |          |          |          |      |          |     |          |      |  |  |
| 15                          | HM163228 | CYE                             | 1  |    | Phyllobacterium sp T1018         | EU928863    | 100          | 751                |                                                                             |      |          |          |          |          |          |          |      |          |     |          |      |  |  |
| 51                          | HM163272 | CYE                             | 1  |    | Rhizobium sp H4                  | AF279889    | 97.3         | 300                |                                                                             |      |          |          |          |          |          |          |      |          |     |          |      |  |  |
| 132                         | HM163225 | CY                              | 1  |    | Devosia riboflavina              | D49423      | 99.7         | 676                |                                                                             |      |          |          |          |          |          |          |      |          |     |          |      |  |  |
| Caulobacteriales            |          |                                 |    |    |                                  |             |              |                    |                                                                             |      |          |          |          |          |          |          |      |          |     |          |      |  |  |
| 129                         | HM163223 | A/CY                            | 1  | 2  | Brevundimonas alba               | AJ227785    | 99.7         | 750                |                                                                             |      |          |          |          |          |          |          |      |          |     |          |      |  |  |
| 37                          | HM163266 | A/CY/CYE                        | 11 |    | Caulobacter sp FWC41             | AJ227775    | 99.9         | 1042               | AY662024                                                                    | 98.8 |          |          |          |          |          |          |      |          |     |          |      |  |  |
| 162                         | HM163232 | A                               |    | 1  | Caulobacter sp FWC38             | M83805      | 99.1         | 759                |                                                                             |      |          |          |          |          |          |          |      |          |     |          |      |  |  |
| 194                         | HM163246 | CY                              | 1  | 1  | Phenyllobacterium sp G26         | AY035307    | 98.6         | 766                |                                                                             |      |          |          |          |          |          |          |      |          |     |          |      |  |  |
| Sphingomonadales            |          |                                 |    |    |                                  |             |              |                    |                                                                             |      |          |          |          |          |          |          |      |          |     |          |      |  |  |
| 215                         | HM163255 | A                               |    | 1  | Sphingomonas sp                  | AJ620200    | 97.3         | 923                |                                                                             |      |          |          |          |          |          |          |      |          |     |          |      |  |  |
| 207                         | HM163250 | A                               |    | 3  | Sphingomonas sp                  | AJ620200    | 97.7         | 980                |                                                                             |      |          |          |          |          |          |          |      |          |     |          |      |  |  |
| 154                         | HM163229 | A                               |    | 1  | Sphingosinicella soli            | DQ087403    | 100          | 517                |                                                                             |      |          |          |          |          |          |          |      |          |     |          |      |  |  |
| 114                         | HM163221 | A/CY                            | 1  | 4  | Sphingomonas echinoides          | AB021370    | 99.8         | 1383               |                                                                             |      |          |          |          |          |          |          |      |          |     |          |      |  |  |
| 84                          | HM163284 | CY/CYE                          | 2  |    | Phaeosporillum fulvum            | AF508113    | 92.7         | 1419               |                                                                             |      |          |          |          |          |          |          |      |          |     |          |      |  |  |
| Rickettsiales               |          |                                 |    |    |                                  |             |              |                    |                                                                             |      |          |          |          |          |          |          |      |          |     |          |      |  |  |
| 205                         | HM163249 | A                               |    | 1  | Bacterium Ellin 5130             | AY234547    | 99.1         | 1421               | AY662022                                                                    | 98.1 |          |          |          |          |          |          |      |          |     |          |      |  |  |
| <b>Beta Proteobacteria</b>  |          |                                 |    |    |                                  |             |              |                    |                                                                             |      |          |          |          |          |          |          |      |          |     |          |      |  |  |
| Burkholderiales             |          |                                 |    |    |                                  |             |              |                    |                                                                             |      |          |          |          |          |          |          |      |          |     |          |      |  |  |
| 214                         | HM163254 | A/CY/CYE                        | 6  | 18 | Ralstonia picketti               | AB004790    | 100          | 1441               | AY662035                                                                    | 97.1 |          |          | AY527778 | 99.7     |          | DQ404678 | 98.2 | DQ316853 | 100 | EF507910 | 97.8 |  |  |
| 58                          | HM163277 | CY                              | 2  | 1  | Cupriavidus necator              | AF191737    | 99.9         | 1434               |                                                                             |      |          |          | AY527742 | 97.4     |          |          |      |          |     |          |      |  |  |
| 192                         | HM163245 | A/CY                            |    | 2  | Duganella nigrescens             | EF584756    | 100          | 722                |                                                                             |      |          |          |          |          |          |          |      |          |     |          |      |  |  |
| 189                         | HM163244 | CY                              |    | 1  | Beta Proteobacterium B7          | AF035053    | 98.9         | 1430               |                                                                             |      |          |          |          |          |          | DQ404909 | 99.3 |          |     |          |      |  |  |
| 148                         | HM163227 | A                               |    | 3  | Pelomonas puraque                | AM501439    | 99.4         | 835                |                                                                             |      |          |          |          |          |          |          |      |          |     |          |      |  |  |
| 210                         | HM163251 | A/CY                            |    | 9  | Pelomonas aquatica               | AM501435    | 100          | 850                |                                                                             |      |          |          |          |          |          |          |      |          |     |          |      |  |  |
| 18                          | HM163240 | CY                              |    | 1  | 2 Mitsuraria chitosanitabida     | EU730923    | 99.4         | 830                |                                                                             |      |          |          |          |          |          |          |      |          |     |          |      |  |  |
| 202                         | HM163247 | CY                              |    | 1  | Imtechium assamiensis            | AY544767    | 99.2         | 762                | AY662015                                                                    | 98.4 | AY622246 | 98.6     | AY527774 | 99.2     |          | DQ316830 | 99.3 |          |     |          |      |  |  |
| 175                         | HM163239 | CY                              |    | 1  | MTBE degrading bacterium         | AF176594    | 95.5         | 705                |                                                                             |      |          |          |          |          |          | DQ404894 | 98.6 |          |     |          |      |  |  |
| 94                          | HM163288 | CY/CYE                          | 5  |    | Methylophilales bacterium TP581  | EF636166    | 100          | 788                |                                                                             |      |          |          |          |          |          |          |      |          |     |          |      |  |  |
| 216                         | HM163256 | CY                              |    | 1  | Methylovorus mays                | AY486132    | 100          | 918                |                                                                             |      |          |          |          |          |          |          |      |          |     |          |      |  |  |
| <b>Gamma Proteobacteria</b> |          |                                 |    |    |                                  |             |              |                    |                                                                             |      |          |          |          |          |          |          |      |          |     |          |      |  |  |
| 27                          | HM163262 | A                               | 1  |    | Pseudomonas chloroaphis          | D86004      | 100          | 740                | AY661940                                                                    | 100  | AY622270 | 100      |          |          |          |          |      |          |     |          |      |  |  |



## References

1. Abulencia CB, *et al.* (2006) Environmental whole-genome amplification to access microbial populations in contaminated sediments. *Appl Environ Microbiol* 72(5):3291-3301.
2. Akob DM, Mills HJ, & Kostka JE (2007) Metabolically active microbial communities in uranium-contaminated subsurface sediments. *FEMS Microbiol Ecol* 59(1):95-107.
3. Brodie EL, *et al.* (2006) Application of a high-density oligonucleotide microarray approach to study bacterial population dynamics during uranium reduction and reoxidation. *Appl Environ Microbiol* 72(9):6288-6298.
4. Fields MW, *et al.* (2005) Impacts on microbial communities and cultivable isolates from groundwater contaminated with high levels of nitric acid-uranium waste. *FEMS Microbiol Ecol* 53(3):417-428.
5. Hemme CL, *et al.* (2010) Metagenomic insights into evolution of a heavy metal-contaminated groundwater microbial community. *ISME J* 4(5):660-672.
6. Michalsen MM, *et al.* (2007) Changes in microbial community composition and geochemistry during uranium and technetium bioimmobilization. *Appl Environ Microbiol* 73(18):5885-5896.
7. North NN, *et al.* (2004) Change in bacterial community structure during in situ biostimulation of subsurface sediment cocontaminated with uranium and nitrate. *Appl Environ Microbiol* 70(8):4911-4920.
8. Reardon CL, *et al.* (2004) Composition and diversity of microbial communities recovered from surrogate minerals incubated in an acidic uranium-contaminated aquifer. *Appl Environ Microbiol* 70(10):6037-6046.
9. Spain AM, *et al.* (2007) Identification and isolation of a *Castellaniella* species important during biostimulation of an acidic nitrate- and uranium-contaminated aquifer. *Appl Environ Microbiol* 73(15):4892-4904.
